# Supplementary material for: Tuning magnetic anisotropy in Co–BaZrO3 vertically aligned nanocomposites for memory device integration
Source: Royal Society of Chemistry journal article supplement (doi:10.1039/c9na00438f), 2019-01-01
Supplement: c9na00438f1.pdf [file c9na00438f1.pdf]

s1

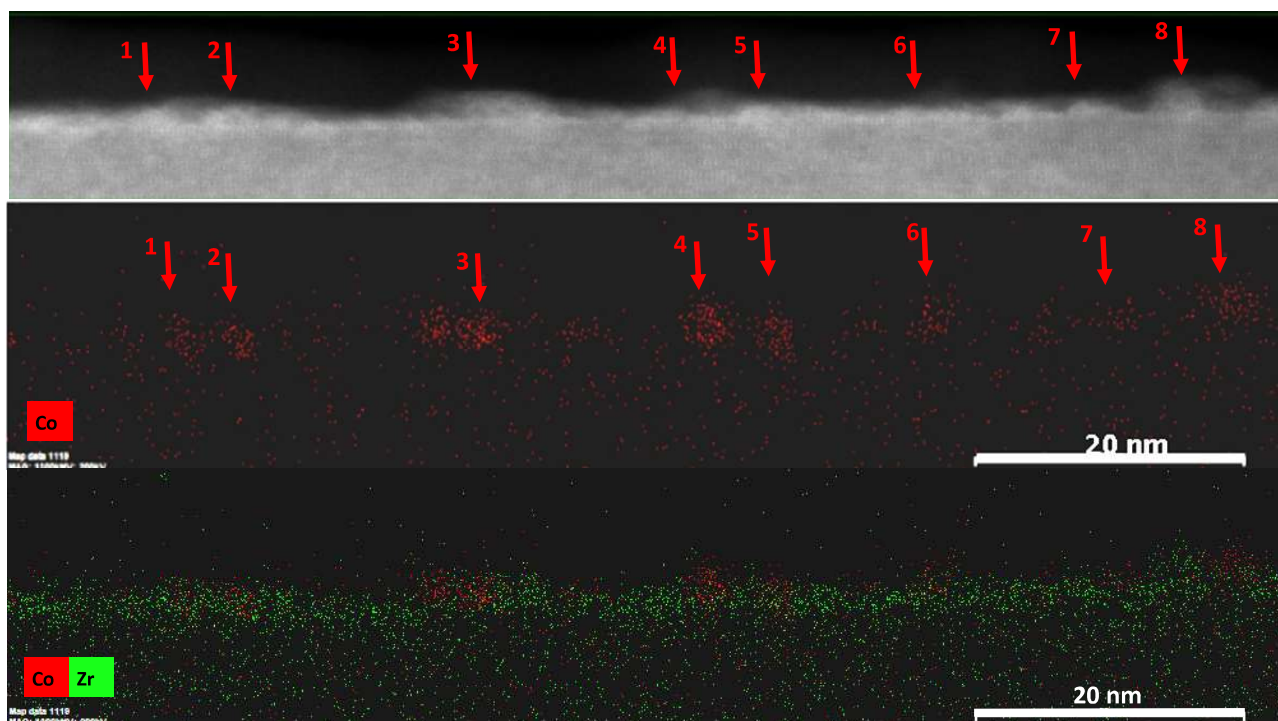

Figure S1. STEM with an EDS mapping verifying the Co islands with BZO region on the 4 nm thick sample with the numbers in the STEM referring to their respective regions in the EDS mapping
